# Supplementary material
Source: PubMed Central journal article supplement (PMC7686898)
Supplement: advancesADV2020002379-suppl1.pdf [file advancesADV2020002379-suppl1.pdf]

**Supplementary Figure 1: An example of cnLOH, detected by CNACS algorithm.** The plots show the CNACS copy number and allelic ratio output of patient for baseline (top panel) and cycle 19, day 1 after idasanutlin therapy (bottom panel) samples. As seen in both figures, in 9p region we observe a total copy number of 2, whereas a clear deviation of the alleles is observed in the allelic ratio panel of the figures. These indicate these samples harbor a cnLOH of 9p locus that includes the JAK2 gene.

## Patient 1 - Baseline

**9p cnLOH (JAK2)**

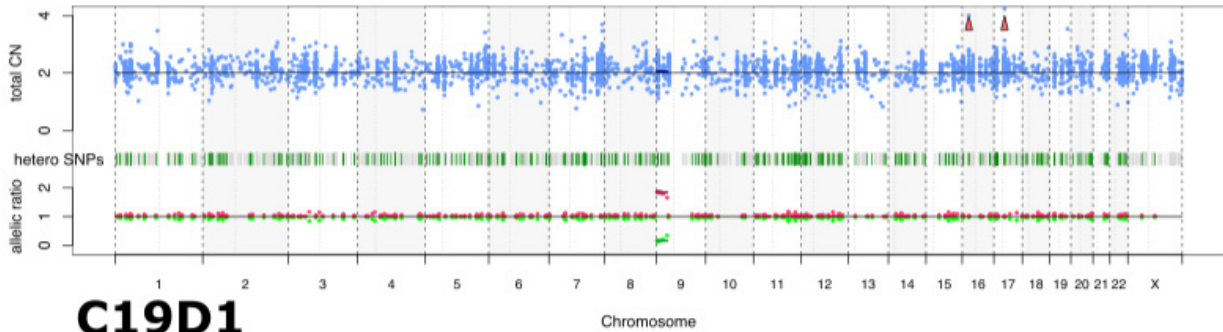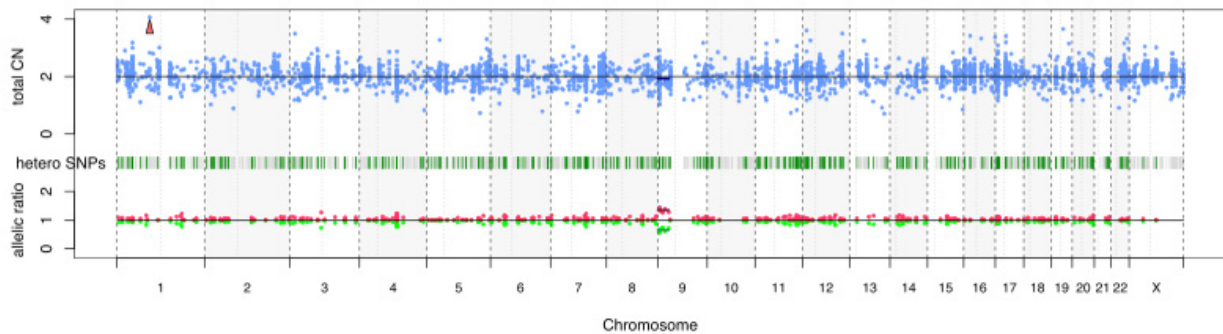

# Supplementary Table 1

| Patient   | Therapy TimeLine  | Gene       | Protein Change   | VAF    | Depth | Sequencing Center               |
|-----------|-------------------|------------|------------------|--------|-------|---------------------------------|
| Patient 1 | Baseline          | DNMT3A     | p.P700L          | 7.79%  | 1592  | MSKCC, TGD Panel (IWG)          |
| Patient 1 | C7D1              | DNMT3A     | p.P700L          | 19.90% | 1533  | MSKCC, TGD Panel (IWG)          |
| Patient 1 | C19D1             | DNMT3A     | p.P700L          | 27.56% | 1005  | MSKCC, TGD Panel (IWG)          |
| Patient 1 | Baseline          | JAK2-V617F | p.V617F          | 83.04% | 1038  | MSKCC, TGD Panel (IWG)          |
| Patient 1 | C7D1              | JAK2-V617F | p.V617F          | 55.74% | 949   | MSKCC, TGD Panel (IWG)          |
| Patient 1 | C19D1             | JAK2-V617F | p.V617F          | 31.18% | 417   | MSKCC, TGD Panel (IWG)          |
| Patient 1 | 7m_PostCessation  | JAK2-V617F | p.V617F          | 65.43% | 512   | Genoptix, TGD Panel             |
| Patient 1 | Baseline          | SH2B3      | p.?              | 4.18%  | 1580  | MSKCC, TGD Panel (IWG)          |
| Patient 1 | C7D1              | SH2B3      | p.?              | 1.81%  | 1604  | MSKCC, TGD Panel (IWG)          |
| Patient 1 | C19D1             | SH2B3      | p.?              | 1.41%  | 922   | MSKCC, TGD Panel (IWG)          |
| Patient 1 | Baseline          | TP53       | p.R248Q          | 0.09%  | 1174  | MSKCC, TGD Panel (IWG)          |
| Patient 1 | C7D1              | TP53       | p.R248Q          | 1.31%  | 1217  | MSKCC, TGD Panel (IWG)          |
| Patient 1 | C19D1             | TP53       | p.R248Q          | 2.03%  | 690   | MSKCC, TGD Panel (IWG)          |
| Patient 1 | 7m_PostCessation  | TP53       | p.R248Q          | 3.17%  | 978   | Genoptix, TGD Panel             |
| Patient 2 | Baseline          | EZH2       | p.N693K          | 39.94% | 1868  | MSKCC, TGD Panel (IWG)          |
| Patient 2 | C7D1              | EZH2       | p.N693K          | 37.74% | 1370  | MSKCC, TGD Panel (IWG)          |
| Patient 2 | C33D1             | EZH2       | p.N693K          | 21.67% | 1043  | MSKCC, TGD Panel (IWG)          |
| Patient 2 | Baseline          | JAK2-V617F | p.V617F          | 99.88% | 867   | MSKCC, TGD Panel (IWG)          |
| Patient 2 | C7D1              | JAK2-V617F | p.V617F          | 98.87% | 706   | MSKCC, TGD Panel (IWG)          |
| Patient 2 | C33D1             | JAK2-V617F | p.V617F          | 64.40% | 545   | MSKCC, TGD Panel (IWG)          |
| Patient 2 | 3m-postCessation  | JAK2-V617F | p.V617F          | 93.00% | NA    | Saint-Louis Hospital, TGD Panel |
| Patient 2 | 6m-postCessation  | JAK2-V617F | p.V617F          | 95.00% | NA    | Saint-Louis Hospital, TGD Panel |
| Patient 2 | 9m-postCessation  | JAK2-V617F | p.V617F          | 95.00% | NA    | Saint-Louis Hospital, TGD Panel |
| Patient 2 | Baseline          | TP53       | p.G245S          | 0.00%  | 1295  | MSKCC, TGD Panel (IWG)          |
| Patient 2 | C7D1              | TP53       | p.G245S          | 0.39%  | 1038  | MSKCC, TGD Panel (IWG)          |
| Patient 2 | C33D1             | TP53       | p.G245S          | 12.18% | 944   | MSKCC, TGD Panel (IWG)          |
| Patient 2 | 3m-postCessation  | TP53       | p.G245S          | 12.10% | 3864  | Saint-Louis Hospital, TGD Panel |
| Patient 2 | 6m-postCessation  | TP53       | p.G245S          | 5.30%  | 2697  | Saint-Louis Hospital, TGD Panel |
| Patient 2 | 9m-postCessation  | TP53       | p.G245S          | 2.00%  | 3466  | Saint-Louis Hospital, TGD Panel |
| Patient 2 | Baseline          | TP53       | p.R175H          | 0.20%  | 1517  | MSKCC, TGD Panel (IWG)          |
| Patient 2 | C7D1              | TP53       | p.R175H          | 0.43%  | 1161  | MSKCC, TGD Panel (IWG)          |
| Patient 2 | C33D1             | TP53       | p.R175H          | 6.93%  | 1083  | MSKCC, TGD Panel (IWG)          |
| Patient 2 | Baseline          | TP53       | p.R248Q          | 0.16%  | 1282  | MSKCC, TGD Panel (IWG)          |
| Patient 2 | C7D1              | TP53       | p.R248Q          | 0.38%  | 1042  | MSKCC, TGD Panel (IWG)          |
| Patient 2 | C33D1             | TP53       | p.R248Q          | 1.68%  | 950   | MSKCC, TGD Panel (IWG)          |
| Patient 2 | 3m-postCessation  | TP53       | p.R248Q          | 1.20%  | 4033  | Saint-Louis Hospital, TGD Panel |
| Patient 2 | 6m-postCessation  | TP53       | p.R248Q          | 0.80%  | 2826  | Saint-Louis Hospital, TGD Panel |
| Patient 2 | 9m-postCessation  | TP53       | p.R248Q          | 0.00%  | 3637  | Saint-Louis Hospital, TGD Panel |
| Patient 2 | Baseline          | TP53       | p.R248W          | 0.00%  | 1279  | MSKCC, TGD Panel (IWG)          |
| Patient 2 | C7D1              | TP53       | p.R248W          | 0.10%  | 1043  | MSKCC, TGD Panel (IWG)          |
| Patient 2 | C33D1             | TP53       | p.R248W          | 2.00%  | 951   | MSKCC, TGD Panel (IWG)          |
| Patient 2 | 3m-postCessation  | TP53       | p.R248W          | 1.90%  | 4023  | Saint-Louis Hospital, TGD Panel |
| Patient 2 | 6m-postCessation  | TP53       | p.R248W          | 1.20%  | 2809  | Saint-Louis Hospital, TGD Panel |
| Patient 2 | 9m-postCessation  | TP53       | p.R248W          | 0.00%  | 3640  | Saint-Louis Hospital, TGD Panel |
| Patient 2 | Baseline          | TP53       | p.V172D          | 0.13%  | 1529  | MSKCC, TGD Panel (IWG)          |
| Patient 2 | C7D1              | TP53       | p.V172D          | 0.25%  | 1200  | MSKCC, TGD Panel (IWG)          |
| Patient 2 | C33D1             | TP53       | p.V172D          | 1.11%  | 1080  | MSKCC, TGD Panel (IWG)          |
| Patient 2 | 3m-postCessation  | TP53       | p.V172D          | 0.80%  | 4378  | Saint-Louis Hospital, TGD Panel |
| Patient 2 | 6m-postCessation  | TP53       | p.V172D          | 0.00%  | 2981  | Saint-Louis Hospital, TGD Panel |
| Patient 2 | 9m-postCessation  | TP53       | p.V172D          | 0.00%  | 3974  | Saint-Louis Hospital, TGD Panel |
| Patient 3 | Baseline          | JAK2-V617F | p.V617F          | 4.30%  | 1023  | MSKCC, TGD Panel (IWG)          |
| Patient 3 | C7D1              | JAK2-V617F | p.V617F          | 4.47%  | 515   | MSKCC, TGD Panel (IWG)          |
| Patient 3 | C14D1             | JAK2-V617F | p.V617F          | 1.37%  | 364   | MSKCC, TGD Panel (IWG)          |
| Patient 3 | 14m_PostCessation | JAK2-V617F | p.V617F          | 20.74% | 593   | Genoptix, TGD Panel             |
| Patient 3 | Baseline          | TP53       | p.G262D          | 0.13%  | 1558  | MSKCC, TGD Panel (IWG)          |
| Patient 3 | C7D1              | TP53       | p.G262D          | 2.00%  | 1298  | MSKCC, TGD Panel (IWG)          |
| Patient 3 | C14D1             | TP53       | p.G262D          | 8.35%  | 1054  | MSKCC, TGD Panel (IWG)          |
| Patient 3 | 14m_PostCessation | TP53       | p.G262D          | 0.00%  | 1     | Genoptix, TGD Panel             |
| Patient 4 | Baseline          | DNMT3A     | p.R366H          | 5.39%  | 1503  | MSKCC, TGD Panel (IWG)          |
| Patient 4 | C7D1              | DNMT3A     | p.R366H          | 4.53%  | 1413  | MSKCC, TGD Panel (IWG)          |
| Patient 4 | C12D1             | DNMT3A     | p.R366H          | 5.62%  | 1744  | MSKCC, TGD Panel (IWG)          |
| Patient 4 | Baseline          | JAK2-V617F | p.V617F          | 69.21% | 916   | MSKCC, TGD Panel (IWG)          |
| Patient 4 | C7D1              | JAK2-V617F | p.V617F          | 17.78% | 478   | MSKCC, TGD Panel (IWG)          |
| Patient 4 | C12D1             | JAK2-V617F | p.V617F          | 12.97% | 617   | MSKCC, TGD Panel (IWG)          |
| Patient 4 | Baseline          | TET2       | p.L1398_N1403del | 4.60%  | 1138  | MSKCC, TGD Panel (IWG)          |
| Patient 4 | C7D1              | TET2       | p.L1398_N1403del | 0.61%  | 1322  | MSKCC, TGD Panel (IWG)          |
| Patient 4 | C12D1             | TET2       | p.L1398_N1403del | 1.01%  | 1689  | MSKCC, TGD Panel (IWG)          |
| Patient 4 | Baseline          | TP53       | p.H193Y          | 0.18%  | 1706  | MSKCC, TGD Panel (IWG)          |
| Patient 4 | C7D1              | TP53       | p.H193Y          | 3.78%  | 1456  | MSKCC, TGD Panel (IWG)          |
| Patient 4 | C12D1             | TP53       | p.H193Y          | 3.66%  | 1967  | MSKCC, TGD Panel (IWG)          |
| Patient 4 | Baseline          | TP53       | p.V143M          | 0.29%  | 1715  | MSKCC, TGD Panel (IWG)          |
| Patient 4 | C7D1              | TP53       | p.V143M          | 6.96%  | 1551  | MSKCC, TGD Panel (IWG)          |
| Patient 4 | C12D1             | TP53       | p.V143M          | 8.72%  | 2007  | MSKCC, TGD Panel (IWG)          |
| Patient 4 | Baseline          | TP53       | p.V203M          | 0.26%  | 1914  | MSKCC, TGD Panel (IWG)          |
| Patient 4 | C7D1              | TP53       | p.V203M          | 2.43%  | 1608  | MSKCC, TGD Panel (IWG)          |
| Patient 4 | C12D1             | TP53       | p.V203M          | 2.82%  | 2164  | MSKCC, TGD Panel (IWG)          |
| Patient 5 | Baseline          | ASXL1      | p.C594fs*25      | 18.45% | 944   | MSKCC, TGD Panel (IWG)          |
| Patient 5 | C7D1              | ASXL1      | p.C594fs*25      | 2.02%  | 1288  | MSKCC, TGD Panel (IWG)          |
| Patient 5 | Baseline          | GNAS       | p.R844H          | 17.26% | 1900  | MSKCC, TGD Panel (IWG)          |
| Patient 5 | C7D1              | GNAS       | p.R844H          | 46.11% | 1759  | MSKCC, TGD Panel (IWG)          |
| Patient 5 | Baseline          | IRF1       | p.W246*          | 1.78%  | 1519  | MSKCC, TGD Panel (IWG)          |
| Patient 5 | C7D1              | IRF1       | p.W246*          | 0.52%  | 1353  | MSKCC, TGD Panel (IWG)          |
| Patient 5 | Baseline          | JAK2-other | p.G301W          | 2.21%  | 1808  | MSKCC, TGD Panel (IWG)          |
| Patient 5 | C7D1              | JAK2-other | p.G301W          | 0.73%  | 1368  | MSKCC, TGD Panel (IWG)          |
| Patient 5 | Baseline          | JAK2-V617F | p.V617F          | 82.73% | 880   | MSKCC, TGD Panel (IWG)          |
| Patient 5 | C7D1              | JAK2-V617F | p.V617F          | 98.55% | 619   | MSKCC, TGD Panel (IWG)          |
| Patient 5 | 20m_PostCessation | JAK2-V617F | p.V617F          | 89.94% | 537   | Genoptix, TGD Panel             |
| Patient 5 | Baseline          | TP53       | p.R248Q          | 1.14%  | 963   | MSKCC, TGD Panel (IWG)          |
| Patient 5 | C7D1              | TP53       | p.R248Q          | 7.40%  | 932   | MSKCC, TGD Panel (IWG)          |
| Patient 5 | 20m_PostCessation | TP53       | p.R248Q          | 0.21%  | 954   | Genoptix, TGD Panel             |
| Patient 5 | Baseline          | TP53       | p.R248W          | 5.50%  | 964   | MSKCC, TGD Panel (IWG)          |
| Patient 5 | C7D1              | TP53       | p.R248W          | 36.73% | 931   | MSKCC, TGD Panel (IWG)          |
| Patient 5 | 20m_PostCessation | TP53       | p.R248W          | 4.99%  | 621   | Genoptix, TGD Panel             |
